# Supplementary material for: Prokaryotic Caspase Homologs: Phylogenetic Patterns and Functional Characteristics Reveal Considerable Diversity
Source: PLoS One. 2012 Nov 19;7(11):e49888. doi: 10.1371/journal.pone.0049888 (PMC3501461; doi:10.1371/journal.pone.0049888)
Supplement: Table S2 — Metacaspases in operons. (XLS) [file pone.0049888.s003.xls]

## Sheet: Metacaspase operons
Table S2. Metacaspases in operons.
Operon metacaspase	Genome	Phylum/class*	Operon neighbors	Combined functions**	Neighbor 1	Gene name 1	Domains 1	Neighbor 2	Gene name 2	Domains 2	Neighbor 3	Gene name 3	Domains 3	Neighbor 4	Gene name 4	Domains 4	Neighbor 5	Gene name 5	Domains 5	Neighbor 6	Gene name 6	Domains 6	Neighbor 7	Gene name 7	Domains 7	Neighbor 8	Gene name 8	Domains 8	Neighbor 9	Gene name 9	Domains 9	Neighbor 10	Gene name 10	Domains 10	Neighbor 11	Gene name 11	Domains 11	Neighbor 12	Gene name 12	Domains 12	Neighbor 13	Gene name 13	Domains 13	Neighbor 14	Gene name 14	Domains 14	Neighbor 15	Gene name 15	Domains 15
None	Candidatus Koribacter versatilis Ellin345	Acidobacteria
YP_822894.1	Candidatus Solibacter usitatus Ellin6076	Acidobacteria	1	Transmembrane	YP_822893.1	hypothetical protein	iTMHo
YP_825676.1	Candidatus Solibacter usitatus Ellin6076	Acidobacteria	1		YP_825675.1	hypothetical protein
YP_827202.1	Candidatus Solibacter usitatus Ellin6076	Acidobacteria	2		YP_827203.1	hypothetical protein		YP_827204.1	hypothetical protein
YP_827647.1	Candidatus Solibacter usitatus Ellin6076	Acidobacteria	3	Anaphase-promoting complex|Cell division|Chaperone|NTPase|Protein-protein interaction|Transmembrane|Unknown function	YP_827645.1	ATPase	AAA_3	YP_827646.1	hypothetical protein	TPR_2|Apc3	YP_827648.1	hypothetical protein	oTMHi|iTMHo|VWA|DUF1355
YP_828820.1	Candidatus Solibacter usitatus Ellin6076	Acidobacteria	2		YP_828818.1	hypothetical protein		YP_828819.1	hypothetical protein
YP_003098006.1	Actinosynnema mirum DSM 43827	Actinobacteria	4	Recombination|Signaling|Transmembrane	YP_003098003.1	hypothetical protein Amir_0186		YP_003098004.1	hypothetical protein Amir_0187	iTMHo|oTMHi|iTMHo	YP_003098005.1	hypothetical protein Amir_0188	DNA_processg_A	YP_003098007.1	hypothetical protein Amir_0190	DUF1863
Operon data missing	Amycolatopsis mediterranei U32	Actinobacteria
None	Arthrobacter sp. FB24	Actinobacteria
None	Beutenbergia cavernae DSM 12333	Actinobacteria
YP_003114570.1	Catenulispora acidiphila DSM 44928	Actinobacteria	1	Enzyme	YP_003114571.1	hypothetical protein Caci_3831	MR_MLE
YP_003114612.1	Catenulispora acidiphila DSM 44928	Actinobacteria	1	Enzyme	YP_003114613.1	hypothetical protein Caci_3884	Abhydrolase_5
Operon data missing	Cellulomonas fimi ATCC 484	Actinobacteria
YP_712674.1	Frankia alni ACN14a	Actinobacteria	1		YP_712675.1	hypothetical protein
None	Frankia sp. EAN1pec	Actinobacteria
Operon data missing	Frankia sp. EuI1c	Actinobacteria
Operon data missing	Intrasporangium calvum DSM 43043	Actinobacteria
YP_003149168.1	Kytococcus sedentarius DSM 20547	Actinobacteria	1	Signaling	YP_003149167.1	hypothetical protein Ksed_13740	DUF1863
Operon data missing	Microlunatus phosphovorus NM-1	Actinobacteria
Operon data missing	Micromonospora aurantiaca ATCC 27029	Actinobacteria
Operon data missing	Micromonospora sp. L5	Actinobacteria
YP_001705536.1	Mycobacterium abscessus ATCC 19977	Actinobacteria	1	Enzyme	YP_001705537.1	hypothetical protein MAB_4815	LACT
Operon data missing	Nocardiopsis dassonvillei subsp. dassonvillei DSM 43111	Actinobacteria
YP_001104528.1	Saccharopolyspora erythraea NRRL 2338	Actinobacteria	1		YP_001104527.1	hypothetical protein SACE_2300
YP_001536391.1	Salinispora arenicola CNS-205	Actinobacteria	1		YP_001536392.1	hypothetical protein
YP_001537689.1	Salinispora arenicola CNS-205	Actinobacteria	1		YP_001537690.1	hypothetical protein
YP_003509172.1	Stackebrandtia nassauensis DSM 44728	Actinobacteria	1	Transmembrane	YP_003509171.1	hypothetical protein Snas_0360	oTMHi
YP_003511708.1	Stackebrandtia nassauensis DSM 44728	Actinobacteria	1		YP_003511709.1	hypothetical protein Snas_2941
YP_003512352.1	Stackebrandtia nassauensis DSM 44728	Actinobacteria	3	Enzyme|Protein-protein interaction	YP_003512349.1	hypothetical protein Snas_3596		YP_003512350.1	hypothetical protein Snas_3597	Abhydrolase_6	YP_003512351.1	WD-40 repeat-containing protein	WD40
NP_822246.1	Streptomyces avermitilis MA-4680	Actinobacteria	2	Enzyme	NP_822244.1	hypothetical protein SAV_1069	Lactamase_B_2	NP_822245.1	hypothetical protein SAV_1070
NP_823514.1	Streptomyces avermitilis MA-4680	Actinobacteria	2	Chaperone|NTPase|Nuclease|PCD|Restriction|Signaling	NP_823512.1	regulatory protein	NB-ARC|NaeI	NP_823513.1	MoxR-like ATPase	AAA_5
NP_825610.1	Streptomyces avermitilis MA-4680	Actinobacteria	1	Nucleoporin|Protein-protein interaction	NP_825609.1	beta transducin-like protein	Nup160|WD40|WD40|WD40
None	Streptomyces coelicolor A3(2)	Actinobacteria
YP_001823564.1	Streptomyces griseus subsp. griseus NBRC 13350	Actinobacteria	3	Chaperone|Enzyme|NTPase	YP_001823563.1	hypothetical protein SGR_2051	PGAP1	YP_001823565.1	MoxR-like ATPase	AAA_5	YP_001823566.1	hypothetical protein SGR_2054
YP_001823574.1	Streptomyces griseus subsp. griseus NBRC 13350	Actinobacteria	1	Protein-protein interaction	YP_001823573.1	beta transducin-like protein	WD40|WD40|WD40|WD40
YP_001823976.1	Streptomyces griseus subsp. griseus NBRC 13350	Actinobacteria	1		YP_001823975.1	hypothetical protein SGR_2463
YP_001826585.1	Streptomyces griseus subsp. griseus NBRC 13350	Actinobacteria	2	Chaperone|NTPase	YP_001826586.1	hypothetical protein SGR_5074	AAA_5	YP_001826587.1	hypothetical protein SGR_5075
YP_003488582.1	Streptomyces scabiei 87.22	Actinobacteria	3	Nuclease|Restriction|Unknown function	YP_003488579.1	type I restriction protein fragment	Methylase_S	YP_003488580.1	type I restriction protein	HSDR_N|ResIII	YP_003488581.1	hypothetical protein	DUF45
YP_003492122.1	Streptomyces scabiei 87.22	Actinobacteria	1		YP_003492123.1	hypothetical protein
Operon data missing	Streptomyces sp. SirexAA-E	Actinobacteria
Operon data missing	Streptomyces violaceusniger Tu 4113	Actinobacteria
None	Thermobifida fusca YX	Actinobacteria
Operon data missing	Verrucosispora maris AB-18-032	Actinobacteria
None	Agrobacterium radiobacter K84	Alphaproteobacteria
None	Agrobacterium vitis S4	Alphaproteobacteria
YP_003451509.1	Azospirillum sp. B510	Alphaproteobacteria	1	Transport	YP_003451510.1	hypothetical protein AZL_b03030	ALMT
None	Beijerinckia indica subsp. indica ATCC 9039	Alphaproteobacteria
NP_766992.1	Bradyrhizobium japonicum USDA 110	Alphaproteobacteria	1	Protein-protein interaction	NP_766993.1	hypothetical protein	TPR_1|TPR_1|TPR_2
NP_770248.1	Bradyrhizobium japonicum USDA 110	Alphaproteobacteria	2	Transmembrane	NP_770247.1	hypothetical protein	iTMHo	NP_770249.1	hypothetical protein
NP_770731.1	Bradyrhizobium japonicum USDA 110	Alphaproteobacteria	1		NP_770730.1	hypothetical protein
NP_772335.1	Bradyrhizobium japonicum USDA 110	Alphaproteobacteria	1	Peptidase C14	NP_772336.1	hypothetical protein	Bac_PepC14
NP_772336.1	Bradyrhizobium japonicum USDA 110	Alphaproteobacteria	1	Peptidase C14	NP_772335.1	hypothetical protein	Bac_PepC14
YP_001220397.1	Bradyrhizobium sp. BTAi1	Alphaproteobacteria	4	Phosphatase|Receptor|Signaling|Unknown function	YP_001220395.1	hypothetical protein BBta_p0026	DUF1863	YP_001220396.1	hypothetical protein BBta_p0027	DUF1863	YP_001220398.1	hypothetical protein BBta_p0029	RyR	YP_001220399.1	hypothetical protein BBta_p0030	Metallophos
YP_001237922.1	Bradyrhizobium sp. BTAi1	Alphaproteobacteria	1		YP_001237923.1	hypothetical protein BBta_1811
YP_001240302.1	Bradyrhizobium sp. BTAi1	Alphaproteobacteria	1	Cell wall binding|Peptidase C14	YP_001240303.1	hypothetical protein BBta_4354	Bac_PepC14|PG_binding_1
YP_001240303.1	Bradyrhizobium sp. BTAi1	Alphaproteobacteria	1	Cell wall binding|Peptidase C14	YP_001240302.1	hypothetical protein BBta_4352	Bac_PepC14|PG_binding_1
YP_001240459.1	Bradyrhizobium sp. BTAi1	Alphaproteobacteria	2	Phosphopeptide binding|Protease|Transmembrane	YP_001240457.1	hypothetical protein BBta_4519	FHA|iTMHo|oTMHi|iTMHo|oTMHi|iTMHo	YP_001240458.1	hypothetical protein BBta_4520	iTMHo|Trypsin
YP_001241426.1	Bradyrhizobium sp. BTAi1	Alphaproteobacteria	1		YP_001241425.1	hypothetical protein BBta_5560
YP_001203382.1	Bradyrhizobium sp. ORS 278	Alphaproteobacteria	1	Protease	YP_001203383.1	hypothetical protein BRADO1243	Peptidase_S8|Peptidase_S8
YP_001205958.1	Bradyrhizobium sp. ORS 278	Alphaproteobacteria	1	Cell wall binding|Peptidase C14	YP_001205959.1	peptidase	Bac_PepC14|PG_binding_1
YP_001205959.1	Bradyrhizobium sp. ORS 278	Alphaproteobacteria	1	Cell wall binding|Peptidase C14	YP_001205958.1	peptidase	Bac_PepC14|PG_binding_1
YP_001206121.1	Bradyrhizobium sp. ORS 278	Alphaproteobacteria	2	Phosphopeptide binding|Protease|Transmembrane	YP_001206119.1	hypothetical protein BRADO4142	FHA|iTMHo|oTMHi|iTMHo|oTMHi|iTMHo	YP_001206120.1	serine protease	iTMHo|Trypsin
YP_001207002.1	Bradyrhizobium sp. ORS 278	Alphaproteobacteria	1		YP_001207001.1	hypothetical protein BRADO5089
Operon data missing	Brevundimonas subvibrioides ATCC 15264	Alphaproteobacteria
Operon data missing	Hyphomicrobium denitrificans ATCC 51888	Alphaproteobacteria
YP_421085.1	Magnetospirillum magneticum AMB-1	Alphaproteobacteria	1		YP_421086.1	hypothetical protein amb1723
Operon data missing	Mesorhizobium ciceri biovar biserrulae WSM1271	Alphaproteobacteria
NP_104440.1	Mesorhizobium loti MAFF303099	Alphaproteobacteria	1	Capsule synthesis|Unknown function	NP_104441.1	encapsulation protein CapA	Memo|PGA_cap
Operon data missing	Mesorhizobium opportunistum WSM2075	Alphaproteobacteria
YP_002420743.1	Methylobacterium chloromethanicum CM4	Alphaproteobacteria	5	Protease|Regulation|Transmembrane|Virulence	YP_002420744.1	hypothetical protein Mchl_1962		YP_002420745.1	virulence factor SrfC-like protein	Virul_Fac	YP_002420746.1	virulence protein SrfB	SrfB	YP_002420747.1	hypothetical protein Mchl_1965	iTMHo	YP_002420748.1	peptidase S1 and S6 chymotrypsin/Hap	Trypsin
None	Methylobacterium extorquens AM1	Alphaproteobacteria
None	Methylobacterium extorquens DM4	Alphaproteobacteria
None	Methylobacterium extorquens PA1	Alphaproteobacteria
YP_002496638.1	Methylobacterium nodulans ORS 2060	Alphaproteobacteria	3	Secretion|Transmembrane|Transport|Unknown function	YP_002496639.1	OmpA/MotB domain-containing protein	OmpA	YP_002496640.1	HlyD family secretion protein	iTMHo|HlyD_2|HlyD_2	YP_002496641.1	acriflavin resistance protein	ACR_tran
YP_001923434.1	Methylobacterium populi BJ001	Alphaproteobacteria	4		YP_001923435.1	hypothetical protein Mpop_0722		YP_001923436.1	hypothetical protein Mpop_0723		YP_001923437.1	hypothetical protein Mpop_0724		YP_001923438.1	hypothetical protein Mpop_0725
YP_001755692.1	Methylobacterium radiotolerans JCM 2831	Alphaproteobacteria	4		YP_001755693.1	hypothetical protein Mrad2831_3028		YP_001755694.1	hypothetical protein Mrad2831_3029		YP_001755695.1	hypothetical protein Mrad2831_3030		YP_001755696.1	hypothetical protein Mrad2831_3031
YP_001767893.1	Methylobacterium sp. 4-46	Alphaproteobacteria	3	Secretion|Transport|Unknown function	YP_001767890.1	acriflavin resistance protein	ACR_tran	YP_001767891.1	HlyD family secretion protein	HlyD_2|HlyD_2	YP_001767892.1	OmpA/MotB domain-containing protein	OmpA
YP_002362663.1	Methylocella silvestris BL2	Alphaproteobacteria	2	Unknown function	YP_002362662.1	putative exported protease/peptidase		YP_002362664.1	OmpA/MotB domain-containing protein	OmpA
None	Nitrobacter hamburgensis X14	Alphaproteobacteria
YP_318269.1	Nitrobacter winogradskyi Nb-255	Alphaproteobacteria	1	Enzyme	YP_318268.1	hypothetical protein	FAD_binding_3
None	Oligotropha carboxidovorans OM5	Alphaproteobacteria
YP_916245.1	Paracoccus denitrificans PD1222	Alphaproteobacteria	1	Haemagglutination	YP_916244.1	filamentous hemagglutinin	Haemagg_act
YP_918608.1	Paracoccus denitrificans PD1222	Alphaproteobacteria	1		YP_918609.1	hypothetical protein Pden_4853
Operon data missing	Polymorphum gilvum SL003B-26A1	Alphaproteobacteria
YP_471607.1	Rhizobium etli CFN 42	Alphaproteobacteria	1	Signaling	YP_471608.1	hypothetical protein RHE_PA00012	DUF1863
YP_472289.1	Rhizobium etli CFN 42	Alphaproteobacteria	1	Transmembrane	YP_472290.1	hypothetical protein RHE_PE00125	iTMHo
YP_472295.1	Rhizobium etli CFN 42	Alphaproteobacteria	4	Kinase|Peptidase C14|Protease|Protease inhibition|Protein modification|Protein-protein interaction|Transmembrane|Unknown function	YP_472294.1	hypothetical protein RHE_PE00129	TPR_1|OmpA	YP_472296.1	serine protease	Trypsin|Bac_PepC14	YP_472297.1	serine proteinase inhibitor protein	Serpin	YP_472298.1	serine(threonine) kinase	Pkinase|iTMHo|FGE-sulfatase
YP_472296.1	Rhizobium etli CFN 42	Alphaproteobacteria	4	Kinase|Peptidase C14|Protease inhibition|Protein modification|Protein-protein interaction|Transmembrane|Unknown function	YP_472294.1	hypothetical protein RHE_PE00129	TPR_1|OmpA	YP_472295.1	hypothetical protein RHE_PE00130	Bac_PepC14	YP_472297.1	serine proteinase inhibitor protein	Serpin	YP_472298.1	serine(threonine) kinase	Pkinase|iTMHo|FGE-sulfatase
None	Rhizobium etli CIAT 652	Alphaproteobacteria
YP_002978823.1	Rhizobium leguminosarum bv. trifolii WSM1325	Alphaproteobacteria	5	Protease	YP_002978819.1	hypothetical protein Rleg_5446		YP_002978820.1	hypothetical protein Rleg_5447		YP_002978821.1	hypothetical protein Rleg_5448		YP_002978822.1	peptidase S1 and S6 chymotrypsin/Hap	Trypsin	YP_002978824.1	peptidase S1 and S6 chymotrypsin/Hap	Trypsin
YP_002979556.1	Rhizobium leguminosarum bv. trifolii WSM1325	Alphaproteobacteria	2	Peptidase C14|Transmembrane	YP_002979557.1	peptidase C14 caspase catalytic subunit p20	iTMHo|Bac_PepC14	YP_002979558.1	hypothetical protein Rleg_6573
YP_002979557.1	Rhizobium leguminosarum bv. trifolii WSM1325	Alphaproteobacteria	2	Peptidase C14	YP_002979556.1	peptidase C14 caspase catalytic subunit p20	Bac_PepC14	YP_002979558.1	hypothetical protein Rleg_6573
YP_002984790.1	Rhizobium leguminosarum bv. trifolii WSM1325	Alphaproteobacteria	2	Transmembrane	YP_002984788.1	hypothetical protein Rleg_6787	oTMHi	YP_002984789.1	hypothetical protein Rleg_6788	iTMHo
YP_002985170.1	Rhizobium leguminosarum bv. trifolii WSM1325	Alphaproteobacteria	1	Transmembrane	YP_002985171.1	hypothetical protein Rleg_7204	iTMHo
YP_002985177.1	Rhizobium leguminosarum bv. trifolii WSM1325	Alphaproteobacteria	4	Kinase|Peptidase C14|Protease|Protease inhibition|Protein modification|Protein-protein interaction|Transmembrane|Unknown function	YP_002985176.1	OmpA/MotB domain protein	TPR_1|OmpA	YP_002985178.1	peptidase S1 and S6 chymotrypsin/Hap	Trypsin|Bac_PepC14	YP_002985179.1	proteinase inhibitor I4 serpin	Serpin	YP_002985180.1	serine/threonine protein kinase	Pkinase|iTMHo|FGE-sulfatase
YP_002985178.1	Rhizobium leguminosarum bv. trifolii WSM1325	Alphaproteobacteria	4	Kinase|Peptidase C14|Protease inhibition|Protein modification|Protein-protein interaction|Transmembrane|Unknown function	YP_002985176.1	OmpA/MotB domain protein	TPR_1|OmpA	YP_002985177.1	peptidase C14 caspase catalytic subunit p20	Bac_PepC14	YP_002985179.1	proteinase inhibitor I4 serpin	Serpin	YP_002985180.1	serine/threonine protein kinase	Pkinase|iTMHo|FGE-sulfatase
YP_002278322.1	Rhizobium leguminosarum bv. trifolii WSM2304	Alphaproteobacteria	3	Peptidase C14|Protease|Protease inhibition|Protein-protein interaction|Unknown function	YP_002278321.1	OmpA/MotB domain protein	TPR_1|OmpA	YP_002278323.1	peptidase S1 and S6 chymotrypsin/Hap	Trypsin|Bac_PepC14	YP_002278324.1	proteinase inhibitor I4 serpin	Serpin
YP_002278323.1	Rhizobium leguminosarum bv. trifolii WSM2304	Alphaproteobacteria	3	Peptidase C14|Protease inhibition|Protein-protein interaction|Unknown function	YP_002278321.1	OmpA/MotB domain protein	TPR_1|OmpA	YP_002278322.1	peptidase C14 caspase catalytic subunit p20	Bac_PepC14	YP_002278324.1	proteinase inhibitor I4 serpin	Serpin
YP_767767.1	Rhizobium leguminosarum bv. viciae 3841	Alphaproteobacteria	1		YP_767768.1	hypothetical protein
YP_771333.1	Rhizobium leguminosarum bv. viciae 3841	Alphaproteobacteria	2	Transmembrane	YP_771334.1	putative transmembrane protein	iTMHo	YP_771335.1	putative transmembrane protein	oTMHi
YP_771623.1	Rhizobium leguminosarum bv. viciae 3841	Alphaproteobacteria	4	Kinase|Peptidase C14|Protease inhibition|Protein modification|Protein-protein interaction|Transmembrane|Unknown function	YP_771621.1	putative transmembrane protein	Pkinase|iTMHo|FGE-sulfatase	YP_771622.1	putative exported serine protease inhibitor	Serpin	YP_771624.1	hypothetical protein	Bac_PepC14	YP_771625.1	putative outer membrane protein	TPR_1|OmpA
YP_771624.1	Rhizobium leguminosarum bv. viciae 3841	Alphaproteobacteria	4	Kinase|Peptidase C14|Protease|Protease inhibition|Protein modification|Protein-protein interaction|Transmembrane|Unknown function	YP_771621.1	putative transmembrane protein	Pkinase|iTMHo|FGE-sulfatase	YP_771622.1	putative exported serine protease inhibitor	Serpin	YP_771623.1	putative exported protease/peptidase	Trypsin|Bac_PepC14	YP_771625.1	putative outer membrane protein	TPR_1|OmpA
YP_354934.1	Rhodobacter sphaeroides 2.4.1	Alphaproteobacteria	1		YP_354933.1	hypothetical protein
YP_355001.1	Rhodobacter sphaeroides 2.4.1	Alphaproteobacteria	2		YP_355002.1	hypothetical protein		YP_355003.1	antifreeze protein, type I
YP_001044946.1	Rhodobacter sphaeroides ATCC 17029	Alphaproteobacteria	1		YP_001044945.1	hypothetical protein Rsph17029_3073
YP_001045014.1	Rhodobacter sphaeroides ATCC 17029	Alphaproteobacteria	3		YP_001045013.1	hypothetical protein Rsph17029_3141		YP_001045015.1	hypothetical protein Rsph17029_3143		YP_001045016.1	antifreeze protein, type I
YP_002520528.1	Rhodobacter sphaeroides KD131	Alphaproteobacteria	1		YP_002520527.1	hypothetical protein RSKD131_3594
YP_002520596.1	Rhodobacter sphaeroides KD131	Alphaproteobacteria	2	Transmembrane	YP_002520597.1	hypothetical protein RSKD131_3664	iTMHo	YP_002520598.1	Antifreeze protein, type I
Operon data missing	Rhodomicrobium vannielii ATCC 17100	Alphaproteobacteria
YP_779844.1	Rhodopseudomonas palustris BisA53	Alphaproteobacteria	3	Secretion|Transmembrane|Transport|Unknown function	YP_779841.1	acriflavin resistance protein	ACR_tran	YP_779842.1	secretion protein HlyD	iTMHo|HlyD_2	YP_779843.1	OmpA/MotB domain-containing protein	OmpA
None	Rhodopseudomonas palustris BisB18	Alphaproteobacteria
YP_568148.1	Rhodopseudomonas palustris BisB5	Alphaproteobacteria	1	Transmembrane|Unknown function	YP_568147.1	OmpA/MotB	iTMHo|OmpA
NP_950011.1	Rhodopseudomonas palustris CGA009	Alphaproteobacteria	3	Secretion|Transmembrane|Transport|Unknown function	NP_950012.1	outer membrane protein OprF	iTMHo|OmpA	NP_950013.1	component of multidrug efflux system	HlyD_2|HlyD_2	NP_950014.1	efflux transporter	ACR_tran
Operon data missing	Rhodopseudomonas palustris DX-1	Alphaproteobacteria
YP_484519.1	Rhodopseudomonas palustris HaA2	Alphaproteobacteria	1	Transmembrane|Unknown function	YP_484518.1	OmpA/MotB	iTMHo|OmpA
YP_001994121.1	Rhodopseudomonas palustris TIE-1	Alphaproteobacteria	1	Unknown function	YP_001994122.1	OmpA/MotB domain-containing protein	OmpA
YP_425955.1	Rhodospirillum rubrum ATCC 11170	Alphaproteobacteria	2	Peptidase C14|Protein-protein interaction|Transmembrane	YP_425956.1	peptidase C14, caspase catalytic subunit p20	WD40|Bac_PepC14	YP_425957.1	hypothetical protein Rru_A0869	iTMHo|oTMHi
YP_425956.1	Rhodospirillum rubrum ATCC 11170	Alphaproteobacteria	2	Peptidase C14|Transmembrane	YP_425955.1	peptidase C14, caspase catalytic subunit p20	Bac_PepC14	YP_425957.1	hypothetical protein Rru_A0869	iTMHo|oTMHi
YP_426461.1	Rhodospirillum rubrum ATCC 11170	Alphaproteobacteria	7	Peptidase C14	YP_426458.1	hypothetical protein Rru_A1370		YP_426459.1	hypothetical protein Rru_A1371		YP_426460.1	hypothetical protein Rru_A1372		YP_426462.1	peptidase C14, caspase catalytic subunit p20	Bac_PepC14	YP_426463.1	hypothetical protein Rru_A1375		YP_426464.1	hypothetical protein Rru_A1376		YP_426465.1	hypothetical protein Rru_A1377
YP_426462.1	Rhodospirillum rubrum ATCC 11170	Alphaproteobacteria	7	Peptidase C14	YP_426458.1	hypothetical protein Rru_A1370		YP_426459.1	hypothetical protein Rru_A1371		YP_426460.1	hypothetical protein Rru_A1372		YP_426461.1	peptidase C14, caspase catalytic subunit p20	Bac_PepC14	YP_426463.1	hypothetical protein Rru_A1375		YP_426464.1	hypothetical protein Rru_A1376		YP_426465.1	hypothetical protein Rru_A1377
YP_612838.1	Ruegeria sp. TM1040	Alphaproteobacteria	1	Protease	YP_612837.1	peptidase C1A, papain	Peptidase_C1
NP_443934.1	Sinorhizobium fredii NGR234	Alphaproteobacteria	2	Enzyme	NP_443935.1	hypothetical 47.4 kDa protein	Abhydrolase_6	NP_443933.1	hypothetical 60.4 kDa protein
Operon data missing	Sphingobium chlorophenolicum L-1	Alphaproteobacteria
YP_001261303.1	Sphingomonas wittichii RW1	Alphaproteobacteria	2		YP_001261304.1	hypothetical protein		YP_001261305.1	hypothetical protein
None	Sphingopyxis alaskensis RB2256	Alphaproteobacteria
YP_001415145.1	Xanthobacter autotrophicus Py2	Alphaproteobacteria	2		YP_001415146.1	hypothetical protein Xaut_0231		YP_001415147.1	hypothetical protein Xaut_0232
YP_001415631.1	Xanthobacter autotrophicus Py2	Alphaproteobacteria	1	Signaling	YP_001415630.1	hypothetical protein Xaut_0721	DUF1863
YP_002121884.1	Hydrogenobaculum sp. Y04AAS1	Aquificae	4	Protein-protein interaction|Transmembrane	YP_002121882.1	hypothetical protein HY04AAS1_1219	iTMHo	YP_002121883.1	hypothetical protein HY04AAS1_1220	iTMHo|oTMHi|iTMHo	YP_002121885.1	hypothetical protein HY04AAS1_1222	iTMHo|oTMHi|iTMHo|oTMHi	YP_002121886.1	hypothetical protein HY04AAS1_1223	TPR_2
YP_213044.1	Bacteroides fragilis NCTC 9343	Bacteroidetes	3	Enzyme|Poly-A RNA polymerase|RNA binding|Signaling|Transmembrane	YP_213045.1	hypothetical protein BF3440	iTMHo	YP_213046.1	hypothetical protein BF3441	oTMHi	YP_213047.1	poly(A) polymerase	PolyA_pol|PolyA_pol_RNAbd|HD
YP_100914.1	Bacteroides fragilis YCH46	Bacteroidetes	3	Enzyme|Poly-A RNA polymerase|RNA binding|Signaling|Transmembrane	YP_100915.1	hypothetical protein BF3638	iTMHo	YP_100916.1	hypothetical protein BF3639	oTMHi	YP_100917.1	tRNA nucleotidyltransferase	PolyA_pol|PolyA_pol_RNAbd|HD
Operon data missing	Bacteroides helcogenes P 36-108	Bacteroidetes
YP_003119724.1	Chitinophaga pinensis DSM 2588	Bacteroidetes	2	Peptidase C14	YP_003119725.1	hypothetical protein		YP_003119726.1	peptidase C14 caspase catalytic subunit p20	Bac_PepC14
YP_003119726.1	Chitinophaga pinensis DSM 2588	Bacteroidetes	2	Peptidase C14	YP_003119724.1	peptidase C14 caspase catalytic subunit p20	Bac_PepC14	YP_003119725.1	hypothetical protein
YP_003121257.1	Chitinophaga pinensis DSM 2588	Bacteroidetes	2	Protein modification|Transmembrane|Unknown function	YP_003121258.1	hypothetical protein	iTMHo|FGE-sulfatase	YP_003121259.1	hypothetical protein	DUF1508|DUF1508
YP_003123104.1	Chitinophaga pinensis DSM 2588	Bacteroidetes	2	Peptidase C14|Protein-protein interaction|Transmembrane	YP_003123103.1	hypothetical protein	iTMHo	YP_003123105.1	hypothetical protein	WD40|WD40|WD40|WD40|WD40|Bac_PepC14
YP_003123105.1	Chitinophaga pinensis DSM 2588	Bacteroidetes	2	Peptidase C14|Transmembrane	YP_003123103.1	hypothetical protein	iTMHo	YP_003123104.1	peptidase C14 caspase catalytic subunit p20	Bac_PepC14
None	Cytophaga hutchinsonii ATCC 33406	Bacteroidetes
YP_003085002.1	Dyadobacter fermentans DSM 18053	Bacteroidetes	2	Transmembrane	YP_003085001.1	hypothetical protein		YP_003085003.1	hypothetical protein	iTMHo|oTMHi
YP_003095881.1	Flavobacteriaceae bacterium 3519-10	Bacteroidetes	2	Protease|Transmembrane	YP_003095882.1	Subtilisin-like serine protease	Peptidase_S8	YP_003095883.1	hypothetical protein FIC_01373	oTMHi
Operon data missing	Fluviicola taffensis DSM 16823	Bacteroidetes
Operon data missing	Haliscomenobacter hydrossis DSM 1100	Bacteroidetes
Operon data missing	Marivirga tractuosa DSM 4126	Bacteroidetes
Operon data missing	Pedobacter saltans DSM 12145	Bacteroidetes
YP_003193908.1	Robiginitalea biformata HTCC2501	Bacteroidetes	2	Transmembrane	YP_003193907.1	hypothetical protein RB2501_04490	iTMHo|oTMHi|iTMHo	YP_003193909.1	hypothetical protein RB2501_04500
Operon data missing	Runella slithyformis DSM 19594	Bacteroidetes
Operon data missing	Sphingobacterium sp. 21	Bacteroidetes
YP_003387780.1	Spirosoma linguale DSM 74	Bacteroidetes	4	Phosphatase|Phosphopeptide binding|Protein modification|Transmembrane	YP_003387781.1	protein serine/threonine phosphatase	PP2C	YP_003387782.1	hypothetical protein Slin_2971	FHA	YP_003387783.1	hypothetical protein Slin_2972		YP_003387784.1	FHA domain-containing protein	FHA|iTMHo
YP_003389641.1	Spirosoma linguale DSM 74	Bacteroidetes	1	Nuclease	YP_003389640.1	hypothetical protein Slin_4863	DUF1016
YP_003391218.1	Spirosoma linguale DSM 74	Bacteroidetes	6	Peptidase C14|Protein-protein interaction|Transmembrane	YP_003391219.1	hypothetical protein Slin_6463		YP_003391220.1	hypothetical protein Slin_6464		YP_003391221.1	hypothetical protein Slin_6465		YP_003391222.1	hypothetical protein Slin_6466		YP_003391223.1	peptidase C14 caspase catalytic subunit p20	iTMHo|TPR_1|TPR_1|Bac_PepC14	YP_003391224.1	hypothetical protein Slin_6468
YP_003391223.1	Spirosoma linguale DSM 74	Bacteroidetes	6	Peptidase C14	YP_003391218.1	hypothetical protein Slin_6462	Bac_PepC14	YP_003391219.1	hypothetical protein Slin_6463		YP_003391220.1	hypothetical protein Slin_6464		YP_003391221.1	hypothetical protein Slin_6465		YP_003391222.1	hypothetical protein Slin_6466		YP_003391224.1	hypothetical protein Slin_6468
YP_003391226.1	Spirosoma linguale DSM 74	Bacteroidetes	2	Peptidase C14|Protease|Protein-protein interaction|Transmembrane|Unknown function	YP_003391225.1	peptidase M48 Ste24p	Peptidase_M48	YP_003391227.1	Sel1 domain-containing protein repeat-containing protein	iTMHo|Bac_PepC14|TPR_1|Sel1|DUF2610|TPR_2|TPR_1|TPR_2
YP_003391227.1	Spirosoma linguale DSM 74	Bacteroidetes	2	Peptidase C14|Protease	YP_003391225.1	peptidase M48 Ste24p	Peptidase_M48	YP_003391226.1	hypothetical protein Slin_6470	Bac_PepC14
Operon data missing	Acidovorax avenae subsp. avenae ATCC 19860	Betaproteobacteria
None	Bordetella bronchiseptica RB50	Betaproteobacteria
None	Burkholderia multivorans ATCC 17616	Betaproteobacteria
None	Burkholderia phymatum STM815	Betaproteobacteria
None	Burkholderia phytofirmans PsJN	Betaproteobacteria
Operon data missing	Burkholderia sp. CCGE1001	Betaproteobacteria
None	Burkholderia sp. CCGE1002	Betaproteobacteria
Operon data missing	Burkholderia sp. CCGE1003	Betaproteobacteria
None	Burkholderia vietnamiensis G4	Betaproteobacteria
None	Burkholderia xenovorans LB400	Betaproteobacteria
YP_003165332.1	Candidatus Accumulibacter phosphatis clade IIA str. UW-1	Betaproteobacteria	3	Conjugation|Regulation|Sensor|Transport|Unknown function	YP_003165330.1	hypothetical protein	FecR	YP_003165331.1	OmpA/MotB domain-containing protein	OmpA	YP_003165333.1	17 kDa surface antigen	TraT
YP_003165469.1	Candidatus Accumulibacter phosphatis clade IIA str. UW-1	Betaproteobacteria	2	NTPase|Ribosome|Translation|Transmembrane|Unknown function	YP_003165467.1	HSR1-like GTP-binding protein	MMR_HSR1|oTMHi|iTMHo|oTMHi	YP_003165468.1	hypothetical protein	iTMHo|oTMHi|DUF2868
YP_003165798.1	Candidatus Accumulibacter phosphatis clade IIA str. UW-1	Betaproteobacteria	1	Protein-protein interaction	YP_003165799.1	TPR repeat-containing protein	TPR_1|TPR_1
YP_003166159.1	Candidatus Accumulibacter phosphatis clade IIA str. UW-1	Betaproteobacteria	2	Enzyme|Transmembrane|Transport	YP_003166160.1	L-carnitine dehydratase/bile acid-inducible protein F	CoA_transf_3	YP_003166161.1	auxin efflux carrier	iTMHo|oTMHi|iTMHo|oTMHi|Mem_trans
YP_003166661.1	Candidatus Accumulibacter phosphatis clade IIA str. UW-1	Betaproteobacteria	1	Unknown function	YP_003166662.1	hypothetical protein	OmpA
YP_003167576.1	Candidatus Accumulibacter phosphatis clade IIA str. UW-1	Betaproteobacteria	1	Enzyme|Transmembrane	YP_003167577.1	Platelet-activating factor acetylhydrolase plasma/intracellular isoform II	iTMHo|Abhydrolase_5
YP_003167586.1	Candidatus Accumulibacter phosphatis clade IIA str. UW-1	Betaproteobacteria	2	Protease|Protein-protein interaction	YP_003167587.1	hypothetical protein	CHAT	YP_003167588.1	hypothetical protein	TPR_1
YP_285752.1	Dechloromonas aromatica RCB	Betaproteobacteria	1		YP_285751.1	hypothetical protein Daro_2548
YP_286816.1	Dechloromonas aromatica RCB	Betaproteobacteria	2	Enzyme|Protease	YP_286818.1	hypothetical protein Daro_3619	Peptidase_M15_3	YP_286817.1	hypothetical protein Daro_3618	LACT|CHAT
Operon data missing	Gallionella capsiferriformans ES-2	Betaproteobacteria
YP_001792207.1	Leptothrix cholodnii SP-6	Betaproteobacteria	2	Protein-protein interaction|Transmembrane	YP_001792208.1	hypothetical protein Lcho_3185	iTMHo|TPR_2	YP_001792209.1	hypothetical protein Lcho_3186
None	Methylibium petroleiphilum PM1	Betaproteobacteria
YP_981439.1	Polaromonas naphthalenivorans CJ2	Betaproteobacteria	1		YP_981438.1	hypothetical protein
YP_982315.1	Polaromonas naphthalenivorans CJ2	Betaproteobacteria	2		YP_982316.1	hypothetical protein		YP_982317.1	hypothetical protein
YP_002980725.1	Ralstonia pickettii 12D	Betaproteobacteria	2	DNA binding|RNA polymerase	YP_002980726.1	hypothetical protein Rpic12D_0753		YP_002980727.1	ECF subfamily RNA polymerase sigma-24 subunit	Sigma70_r4_2
Operon data missing	Rhodoferax ferrireducens T118	Betaproteobacteria
None	Thauera sp. MZ1T	Betaproteobacteria
Operon data missing	Variovorax paradoxus EPS	Betaproteobacteria
None	Variovorax paradoxus S110	Betaproteobacteria
None	Candidatus Protochlamydia amoebophila UWE25	Chlamydiae
Operon data missing	Parachlamydia acanthamoebae UV-7	Chlamydiae
Operon data missing	Waddlia chondrophila WSU 86-1044	Chlamydiae
None	Chlorobium chlorochromatii CaD3	Chlorobi
None	Chlorobium limicola DSM 245	Chlorobi
YP_001959740.1	Chlorobium phaeobacteroides BS1	Chlorobi	2		YP_001959739.1	hypothetical protein Cphamn1_1328		YP_001959741.1	hypothetical protein Cphamn1_1330
None	Chlorobium phaeobacteroides DSM 266	Chlorobi
YP_002018339.1	Pelodictyon phaeoclathratiforme BU-1	Chlorobi	2	Unknown function	YP_002018337.1	hypothetical protein Ppha_1468	DUF900	YP_002018338.1	hypothetical protein Ppha_1469
None	Prosthecochloris aestuarii DSM 271	Chlorobi
None	Chloroflexus aurantiacus J-10-fl	Chloroflexi
None	Chloroflexus sp. Y-400-fl	Chloroflexi
YP_182112.1	Dehalococcoides ethenogenes 195	Chloroflexi	1	Nuclease	YP_182113.1	hypothetical protein DET1404	DNA_pol_B_exo1
YP_001214669.1	Dehalococcoides sp. BAV1	Chloroflexi	2	Enzyme|Nuclease	YP_001214668.1	Zn-dependent hydrolase of the beta-lactamase fold-like protein	Lactamase_B_2	YP_001214670.1	exonuclease-like protein	DNA_pol_B_exo1
YP_308327.1	Dehalococcoides sp. CBDB1	Chloroflexi	2	Enzyme|Nuclease	YP_308326.1	cbdbA1363 gene product	Lactamase_B_2	YP_308328.1	cbdbA1366 gene product	DNA_pol_B_exo1
YP_003462937.1	Dehalococcoides sp. GT	Chloroflexi	2	Enzyme|Nuclease	YP_003462936.1	hypothetical protein DehalGT_1120	Lactamase_B_2	YP_003462938.1	hypothetical protein DehalGT_1122	DNA_pol_B_exo1
Operon data missing	Dehalococcoides sp. VS	Chloroflexi
YP_001543601.1	Herpetosiphon aurantiacus DSM 785	Chloroflexi	1	Enzyme	YP_001543602.1	hypothetical protein	Catalase
YP_001546950.1	Herpetosiphon aurantiacus DSM 785	Chloroflexi	1	Protease	YP_001546949.1	hypothetical protein	CHAT
YP_001547922.1	Herpetosiphon aurantiacus DSM 785	Chloroflexi	2	Transmembrane	YP_001547923.1	hypothetical protein Haur_5167		YP_001547924.1	hypothetical protein Haur_5168	iTMHo|oTMHi|iTMHo|oTMHi
YP_001431714.1	Roseiflexus castenholzii DSM 13941	Chloroflexi	3	NTPase|PCD|Peptidase C14|Unknown function	YP_001431712.1	signal transduction protein	NACHT	YP_001431713.1	hypothetical protein Rcas_1603	Bac_PepC14	YP_001431715.1	ATPase AAA	DUF499
None	Roseiflexus sp. RS-1	Chloroflexi
Operon data missing	'Nostoc azollae' 0708	Cyanobacteria
YP_001514425.1	Acaryochloris marina MBIC11017	Cyanobacteria	1	Transmembrane	YP_001514426.1	hypothetical protein	iTMHo
YP_001515885.1	Acaryochloris marina MBIC11017	Cyanobacteria	1		YP_001515884.1	hypothetical protein
YP_001518857.1	Acaryochloris marina MBIC11017	Cyanobacteria	1	Enzyme	YP_001518856.1	sat gene product	ATP-sulfurylase
YP_322698.1	Anabaena variabilis ATCC 29413	Cyanobacteria	1	Peptidase C14|Protein-protein interaction	YP_322699.1	peptidase C14	Bac_PepC14|WD40|WD40|WD40|WD40|WD40|WD40|WD40|WD40|TPR_2
YP_322699.1	Anabaena variabilis ATCC 29413	Cyanobacteria	1	NTPase|PCD|Peptidase C14|Protein-protein interaction|Unknown function	YP_322698.1	peptidase C14	Bac_PepC14|NACHT|Pentapeptide|WD40|WD40|WD40|WD40|WD40|WD40|WD40|WD40|WD40|WD40|WD40|WD40|WD40|WD40
YP_322894.1	Anabaena variabilis ATCC 29413	Cyanobacteria	1	Enzyme	YP_322895.1	sat gene product	ATP-sulfurylase
YP_323582.1	Anabaena variabilis ATCC 29413	Cyanobacteria	2	Peptidase C14|Protein-protein interaction|Regulation|Sensor|Signaling	YP_323583.1	peptidase C14	Bac_PepC14|WD40|WD40|WD40|WD40|WD40|WD40|WD40|WD40|WD40|WD40|WD40|WD40|WD40	YP_323584.1	hypothetical protein	PrpR_N
YP_323583.1	Anabaena variabilis ATCC 29413	Cyanobacteria	2	NTPase|PCD|Peptidase C14|Protein-protein interaction|Regulation|Sensor|Signaling	YP_323582.1	peptidase C14	Bac_PepC14|NACHT|WD40|WD40|WD40|WD40|WD40|WD40|WD40|WD40|WD40|WD40|WD40|WD40|WD40	YP_323584.1	hypothetical protein	PrpR_N
Operon data missing	cyanobacterium UCYN-A	Cyanobacteria
YP_001805059.1	Cyanothece sp. ATCC 51142	Cyanobacteria	4	NTPase|Transmembrane|Transport	YP_001805055.1	ABC transporter ATP-binding protein	ABC_tran	YP_001805056.1	putative ABC-2 type transport system permease	iTMHo|oTMHi|iTMHo|oTMHi|iTMHo|oTMHi	YP_001805057.1	hypothetical protein cce_3643	iTMHo|oTMHi|iTMHo|ABC_transp_aux|oTMHi	YP_001805058.1	hypothetical protein cce_3644	iTMHo
YP_001806071.1	Cyanothece sp. ATCC 51142	Cyanobacteria	2		YP_001806069.1	hypothetical protein cce_4655		YP_001806070.1	hypothetical protein cce_4656
YP_002375997.1	Cyanothece sp. PCC 7424	Cyanobacteria	1		YP_002375996.1	hypothetical protein PCC7424_0669
YP_002376083.1	Cyanothece sp. PCC 7424	Cyanobacteria	2	Enzyme	YP_002376084.1	hypothetical protein PCC7424_0760		YP_002376085.1	hypothetical protein PCC7424_0761	Polyketide_cyc2
YP_002376375.1	Cyanothece sp. PCC 7424	Cyanobacteria	1		YP_002376376.1	hypothetical protein PCC7424_1054
YP_002378823.1	Cyanothece sp. PCC 7424	Cyanobacteria	1		YP_002378824.1	hypothetical protein PCC7424_3566
YP_002379276.1	Cyanothece sp. PCC 7424	Cyanobacteria	1	Transmembrane	YP_002379277.1	hypothetical protein PCC7424_4035	oTMHi
YP_002481343.1	Cyanothece sp. PCC 7425	Cyanobacteria	1	Enzyme	YP_002481344.1	hypothetical protein	PGAP1
None	Cyanothece sp. PCC 7822	Cyanobacteria
YP_002364704.1	Cyanothece sp. PCC 8801	Cyanobacteria	2	DNA binding|RNA polymerase|Unknown function	YP_002364705.1	putative RNA polymerase, sigma 28 subunit, FliA/WhiG subfamily	Sigma70_r2|Sigma70_r4	YP_002364706.1	Protein of unknown function DUF1822	DUF1822
YP_002370804.1	Cyanothece sp. PCC 8801	Cyanobacteria	3	Enzyme|Vesicle coat	YP_002370805.1	hypothetical protein PCC8801_0558		YP_002370806.1	hypothetical protein PCC8801_0559		YP_002370807.1	thioredoxin	Thioredoxin|Coatomer_E
YP_003135775.1	Cyanothece sp. PCC 8802	Cyanobacteria	2	DNA binding|RNA polymerase|Unknown function	YP_003135773.1	Protein of unknown function DUF1822	DUF1822	YP_003135774.1	putative RNA polymerase, sigma 28 subunit, FliA/WhiG subfamily	Sigma70_r2|Sigma70_r4
YP_003136357.1	Cyanothece sp. PCC 8802	Cyanobacteria	3	Enzyme|Vesicle coat	YP_003136358.1	hypothetical protein		YP_003136359.1	hypothetical protein		YP_003136360.1	thioredoxin domain-containing protein	Thioredoxin|Coatomer_E
NP_926607.1	Gloeobacter violaceus PCC 7421	Cyanobacteria	1	Unknown function	NP_926606.1	hypothetical protein gll3660	DUF928
YP_001656752.1	Microcystis aeruginosa NIES-843	Cyanobacteria	2	Enzyme	YP_001656751.1	hypothetical protein MAE_17370		YP_001656753.1	sulfate adenylyltransferase	ATP-sulfurylase
YP_001657661.1	Microcystis aeruginosa NIES-843	Cyanobacteria	1	Enzyme	YP_001657660.1	hypothetical protein MAE_26460	Abhydrolase_6
YP_001657878.1	Microcystis aeruginosa NIES-843	Cyanobacteria	1	Enzyme	YP_001657879.1	hypothetical protein MAE_28650	Abhydrolase_6
YP_001866711.1	Nostoc punctiforme PCC 73102	Cyanobacteria	2	Unknown function	YP_001866712.1	hypothetical protein Npun_R3339	DUF1822|DUF1822	YP_001866713.1	hypothetical protein Npun_R3340
YP_001868699.1	Nostoc punctiforme PCC 73102	Cyanobacteria	1	Protein-protein interaction|Transmembrane	YP_001868700.1	hypothetical protein Npun_F5450	iTMHo|oTMHi|TPR_1|TPR_1|TPR_1
YP_001868887.1	Nostoc punctiforme PCC 73102	Cyanobacteria	1		YP_001868888.1	hypothetical protein Npun_R5643
YP_001869994.1	Nostoc punctiforme PCC 73102	Cyanobacteria	2	Protease|Protein-protein interaction	YP_001869995.1	hypothetical protein Npun_AR072	CHAT	YP_001869996.1	TPR repeat-containing protein	TPR_2|TPR_1|TPR_1|TPR_2|TPR_1|CHAT
YP_001870016.1	Nostoc punctiforme PCC 73102	Cyanobacteria	1	Protease|Protein-protein interaction	YP_001870015.1	Fis family transcriptional regulator	TPR_1|TPR_1|TPR_1|TPR_1|TPR_1|TPR_1|CHAT
NP_484327.1	Nostoc sp. PCC 7120	Cyanobacteria	1	NTPase|PCD|Peptidase C14|Protein-protein interaction	NP_484328.1	hypothetical protein	Bac_PepC14|NACHT|WD40|WD40|WD40|WD40|WD40|WD40|WD40|WD40|WD40|WD40|WD40|WD40|WD40
NP_484328.1	Nostoc sp. PCC 7120	Cyanobacteria	1	Peptidase C14|Protein-protein interaction	NP_484327.1	hypothetical protein	Bac_PepC14|WD40|WD40|WD40|WD40|WD40|WD40|WD40|WD40|WD40|WD40|WD40|WD40|WD40
NP_487266.1	Nostoc sp. PCC 7120	Cyanobacteria	1		NP_487267.1	hypothetical protein
NP_489057.1	Nostoc sp. PCC 7120	Cyanobacteria	1		NP_489058.1	hypothetical protein
None	Synechococcus elongatus PCC 6301	Cyanobacteria
None	Synechococcus elongatus PCC 7942	Cyanobacteria
None	Synechococcus sp. JA-2-3B'a(2-13)	Cyanobacteria
None	Synechococcus sp. JA-3-3Ab	Cyanobacteria
None	Synechococcus sp. PCC 7002	Cyanobacteria
NP_441876.1	Synechocystis sp. PCC 6803	Cyanobacteria	1		NP_441875.1	hypothetical protein sll0149
None	Thermosynechococcus elongatus BP-1	Cyanobacteria
YP_720323.1	Trichodesmium erythraeum IMS101	Cyanobacteria	3	Protein-protein interaction|Transmembrane|Unknown function	YP_720322.1	hypothetical protein	iTMHo|DUF928	YP_720324.1	hypothetical protein		YP_720325.1	WD-40 repeat-containing protein	WD40|WD40|WD40|WD40|WD40
YP_721865.1	Trichodesmium erythraeum IMS101	Cyanobacteria	2	Protease|Unknown function	YP_721864.1	hypothetical protein	UPF0079	YP_721866.1	hypothetical protein	CHAT
YP_722154.1	Trichodesmium erythraeum IMS101	Cyanobacteria	2	Phytochelatin synthesis	YP_722153.1	hypothetical protein		YP_722155.1	phytochelatin synthase-like	Phytochelatin
YP_722292.1	Trichodesmium erythraeum IMS101	Cyanobacteria	1	Enzyme	YP_722293.1	sat gene product	ATP-sulfurylase
YP_722351.1	Trichodesmium erythraeum IMS101	Cyanobacteria	1		YP_722352.1	hypothetical protein
Operon data missing	Calditerrivibrio nitroreducens DSM 19672	Deferribacteres
YP_003496133.1	Deferribacter desulfuricans SSM1	Deferribacteres	1	Transmembrane	YP_003496134.1	hypothetical protein DEFDS_0904	iTMHo
YP_003503053.1	Denitrovibrio acetiphilus DSM 12809	Deferribacteres	7	Flagellum|Protein translocation|Secretion|Transmembrane|Transport|Unknown function|Virulence	YP_003503046.1	MotA/TolQ/ExbB proton channel	iTMHo|oTMHi|MotA_ExbB	YP_003503047.1	OmpA/MotB domain-containing protein	oTMHi|OmpA	YP_003503048.1	flagellar basal body-associated protein FliL	FliL	YP_003503049.1	surface presentation of antigens (SPOA) protein	SpoA	YP_003503050.1	hypothetical protein Dacet_0294	iTMHo|oTMHi|FliO	YP_003503051.1	flagellar biosynthetic protein FliP	iTMHo|FliP	YP_003503052.1	flagellar biosynthetic protein FliQ	Bac_export_3
YP_003505066.1	Denitrovibrio acetiphilus DSM 12809	Deferribacteres	3	Transmembrane	YP_003505067.1	hypothetical protein Dacet_2349		YP_003505068.1	hypothetical protein Dacet_2350	oTMHi	YP_003505069.1	hypothetical protein Dacet_2351	oTMHi
YP_002491396.1	Anaeromyxobacter dehalogenans 2CP-1	Deltaproteobacteria	2	RNA polymerase	YP_002491394.1	ECF subfamily RNA polymerase sigma-24 subunit	Sigma70_r2	YP_002491395.1	hypothetical protein A2cp1_0978
YP_465620.1	Anaeromyxobacter dehalogenans 2CP-C	Deltaproteobacteria	1		YP_465619.1	hypothetical protein Adeh_2412
Operon data missing	Anaeromyxobacter sp. Fw109-5	Deltaproteobacteria
YP_002133346.1	Anaeromyxobacter sp. K	Deltaproteobacteria	2	RNA polymerase	YP_002133344.1	ECF subfamily RNA polymerase sigma-24 subunit	Sigma70_r2	YP_002133345.1	hypothetical protein AnaeK_0981
YP_002431293.1	Desulfatibacillum alkenivorans AK-01	Deltaproteobacteria	1	Peptidase C14|Protein-carbohydrate interaction|Protein-protein interaction|Transmembrane	YP_002431294.1	two component regulator propeller domain-containing protein	iTMHo|PKD|Reg_prop|Reg_prop|Bac_PepC14
YP_002431294.1	Desulfatibacillum alkenivorans AK-01	Deltaproteobacteria	1	Peptidase C14	YP_002431293.1	hypothetical protein	Bac_PepC14
YP_002432633.1	Desulfatibacillum alkenivorans AK-01	Deltaproteobacteria	1	Protein modification|Transmembrane	YP_002432632.1	hypothetical protein	iTMHo|FGE-sulfatase
None	Desulfobacterium autotrophicum HRM2	Deltaproteobacteria
Operon data missing	Desulfobulbus propionicus DSM 2032	Deltaproteobacteria
YP_001528659.1	Desulfococcus oleovorans Hxd3	Deltaproteobacteria	3	Amino acid kinase|Enzyme|Regulation|Unknown function	YP_001528660.1	aspartate kinase	AA_kinase|ACT|ACT	YP_001528661.1	hypothetical protein Dole_0774	UPF0079	YP_001528662.1	carbohydrate kinase	YjeF_N|Carb_kinase
YP_001530778.1	Desulfococcus oleovorans Hxd3	Deltaproteobacteria	4	Enzyme|Peptidase C14|Protein-protein interaction|Transmembrane|Unknown function	YP_001530779.1	ankyrin	Ank_2|Bac_PepC14	YP_001530780.1	peptidase C14 caspase catalytic subunit p20	Ank_2|Bac_PepC14	YP_001530781.1	hypothetical protein Dole_2901	iTMHo|DUF400	YP_001530782.1	zinc-binding CMP/dCMP deaminase	dCMP_cyt_deam_1
YP_001530779.1	Desulfococcus oleovorans Hxd3	Deltaproteobacteria	4	Enzyme|Peptidase C14|Protein-protein interaction|Transmembrane|Unknown function	YP_001530778.1	peptidase C14 caspase catalytic subunit p20	Ank_2|Bac_PepC14	YP_001530780.1	peptidase C14 caspase catalytic subunit p20	Ank_2|Bac_PepC14	YP_001530781.1	hypothetical protein Dole_2901	iTMHo|DUF400	YP_001530782.1	zinc-binding CMP/dCMP deaminase	dCMP_cyt_deam_1
YP_001530780.1	Desulfococcus oleovorans Hxd3	Deltaproteobacteria	4	Enzyme|Peptidase C14|Protein-protein interaction|Transmembrane|Unknown function	YP_001530778.1	peptidase C14 caspase catalytic subunit p20	Ank_2|Bac_PepC14	YP_001530779.1	ankyrin	Ank_2|Bac_PepC14	YP_001530781.1	hypothetical protein Dole_2901	iTMHo|DUF400	YP_001530782.1	zinc-binding CMP/dCMP deaminase	dCMP_cyt_deam_1
YP_064948.1	Desulfotalea psychrophila LSv54	Deltaproteobacteria	3	Transmembrane|Unknown function	YP_064945.1	hypothetical protein DP1209	iTMHo	YP_064946.1	S-layer-like array-related protein	iTMHo	YP_064947.1	outer membrane porin F	iTMHo|OmpA
None	Desulfovibrio magneticus RS-1	Deltaproteobacteria
Operon data missing	Desulfovibrio salexigens DSM 2638	Deltaproteobacteria
YP_001951844.1	Geobacter lovleyi SZ	Deltaproteobacteria	5	Biotin binding|Enzyme|Transmembrane	YP_001951845.1	S-layer protein	iTMHo	YP_001951846.1	hypothetical protein Glov_1610	Biotin_lipoyl|E3_binding|2-oxoacid_dh	YP_001951847.1	dihydrolipoamide dehydrogenase	Pyr_redox_2|Pyr_redox_dim	YP_001951848.1	aconitate hydratase	Aconitase|Aconitase|Aconitase_C	YP_001951849.1	pyruvate kinase	PK|PK_C
YP_001952768.1	Geobacter lovleyi SZ	Deltaproteobacteria	2	Protease|Protein-protein interaction|Transmembrane	YP_001952767.1	hypothetical protein Glov_2533	TPR_2|TPR_1|TPR_1|TPR_1|CHAT	YP_001952769.1	hypothetical protein Glov_2535	oTMHi|iTMHo|oTMHi
Operon data missing	Geobacter sp. M18	Deltaproteobacteria
None	Geobacter sp. M21	Deltaproteobacteria
NP_951773.1	Geobacter sulfurreducens PCA	Deltaproteobacteria	1	Enzyme|Unknown function	NP_951772.1	hypothetical protein GSU0715	Amidase_2|SH3_3
YP_001232709.1	Geobacter uraniireducens Rf4	Deltaproteobacteria	2	Protease|Protease inhibition|Transmembrane	YP_001232707.1	peptidase M23B	iTMHo|Peptidase_M23	YP_001232708.1	hypothetical protein Gura_3991	Serpin
YP_003266051.1	Haliangium ochraceum DSM 14365	Deltaproteobacteria	3	Kinase|Protein modification|RNA polymerase	YP_003266048.1	serine/threonine protein kinase	Pkinase	YP_003266049.1	ECF subfamily RNA polymerase sigma-24 subunit	Sigma70_r2	YP_003266050.1	hypothetical protein
YP_003267511.1	Haliangium ochraceum DSM 14365	Deltaproteobacteria	3	DNA binding|RNA polymerase|Transmembrane	YP_003267509.1	ECF subfamily RNA polymerase sigma-24 subunit	Sigma70_r2|Sigma70_r4_2	YP_003267510.1	hypothetical protein	iTMHo	YP_003267512.1	hypothetical protein
Operon data missing	Myxococcus fulvus HW-1	Deltaproteobacteria
YP_633107.1	Myxococcus xanthus DK 1622	Deltaproteobacteria	4	Protein-carbohydrate interaction|Protein-protein interaction|RNA polymerase|Transmembrane	YP_633105.1	ECF subfamily RNA polymerase sigma factor	Sigma70_r2	YP_633106.1	hypothetical protein MXAN_4950	iTMHo	YP_633108.1	lipoprotein		YP_633109.1	PKD domain-containing protein	PKD|PKD
YP_634800.1	Myxococcus xanthus DK 1622	Deltaproteobacteria	3	DNA binding|RNA polymerase|Transmembrane	YP_634798.1	ECF subfamily RNA polymerase sigma factor	Sigma70_r4	YP_634799.1	hypothetical protein MXAN_6682	iTMHo	YP_634801.1	lipoprotein
YP_635329.1	Myxococcus xanthus DK 1622	Deltaproteobacteria	2	DNA binding|RNA polymerase	YP_635327.1	ECF subfamily RNA polymerase sigma factor	Sigma70_r2|Sigma70_r4_2	YP_635328.1	hypothetical protein MXAN_7215
YP_635561.1	Myxococcus xanthus DK 1622	Deltaproteobacteria	2	RNA polymerase	YP_635559.1	ECF subfamily RNA polymerase sigma factor	Sigma70_r2	YP_635560.1	hypothetical protein MXAN_7455
YP_900811.1	Pelobacter propionicus DSM 2379	Deltaproteobacteria	1	Enzyme	YP_900812.1	hypothetical protein	LACT
YP_001611549.1	Sorangium cellulosum 'So ce 56'	Deltaproteobacteria	1	Transmembrane	YP_001611550.1	hypothetical protein	oTMHi
YP_001613848.1	Sorangium cellulosum 'So ce 56'	Deltaproteobacteria	6	NTPase|Protease|Receptor|Regulation|Signaling|Transmembrane	YP_001613843.1	hypothetical protein		YP_001613844.1	hypothetical protein		YP_001613845.1	subtilisin like protease	Peptidase_S8	YP_001613846.1	two component sensor kinase	iTMHo|oTMHi|iTMHo|oTMHi|iTMHo|oTMHi|iTMHo|oTMHi|iTMHo|oTMHi|HATPase_c	YP_001613847.1	sigma-54 dependent DNA-binding response regulator	Response_reg|Sigma54_activat	YP_001613849.1	WD repeat-containing protein	Arch_ATPase
YP_001615773.1	Sorangium cellulosum 'So ce 56'	Deltaproteobacteria	1		YP_001615774.1	hypothetical protein
YP_001617250.1	Sorangium cellulosum 'So ce 56'	Deltaproteobacteria	2	DNA binding|RNA polymerase	YP_001617251.1	hypothetical protein		YP_001617252.1	ECF family RNA polymerase sigma factor	Sigma70_r2|Sigma70_r4_2
None	Stigmatella aurantiaca DW4/3-1	Deltaproteobacteria
YP_844690.1	Syntrophobacter fumaroxidans MPOB	Deltaproteobacteria	2	Signaling|Transmembrane	YP_844691.1	hypothetical protein Sfum_0557		YP_844692.1	adenylate/guanylate cyclase	CHASE2|iTMHo|oTMHi|Guanylate_cyc
YP_001481842.1	Campylobacter jejuni subsp. jejuni 81116	Epsilonproteobacteria	1	DNA methylation	YP_001481843.1	hypothetical protein C8J_0267	N6_N4_Mtase
Operon data missing	Methanosaeta concilii GP6	Euryarchaeota
YP_305101.1	Methanosarcina barkeri str. Fusaro	Euryarchaeota	3	Fibronectin-binding|Translation|Transmembrane|Unknown function|Virulence	YP_305100.1	hypothetical protein Mbar_A1573	oTMHi	YP_305102.1	hypothetical protein Mbar_A1575	FbpA|DUF814	YP_305103.1	cell division protein pelota	eRF1_1|eRF1_2|eRF1_3
Operon data missing	Methanothermus fervidus DSM 2088	Euryarchaeota
Operon data missing	Pyrococcus yayanosii CH1	Euryarchaeota
None	Thermococcus onnurineus NA1	Euryarchaeota
YP_003248999.1	Fibrobacter succinogenes subsp. succinogenes S85	Fibrobacteres	2	RNA polymerase|Transmembrane	YP_003249000.1	hypothetical protein Fisuc_0911	iTMHo	YP_003249001.1	ECF subfamily RNA polymerase sigma-24 subunit	Sigma70_r2
None	Alkaliphilus metalliredigens QYMF	Firmicutes
None	Bacillus cereus AH187	Firmicutes
None	Bacillus cereus AH820	Firmicutes
YP_003425700.1	Bacillus pseudofirmus OF4	Firmicutes	1	Phosphatase|Protein modification	YP_003425701.1	gpm gene product	His_Phos_1
Operon data missing	Butyrivibrio proteoclasticus B316	Firmicutes
Operon data missing	Carnobacterium sp. 17-4	Firmicutes
None	Clostridiales genomosp. BVAB3 str. UPII9-5	Firmicutes
YP_001385348.1	Clostridium botulinum A str. ATCC 19397	Firmicutes	10	Transmembrane	YP_001385342.1	hypothetical protein CLB_3048		YP_001385343.1	hypothetical protein CLB_3049		YP_001385344.1	hypothetical protein CLB_3050		YP_001385345.1	hypothetical protein CLB_3051		YP_001385346.1	hypothetical protein CLB_3052		YP_001385347.1	hypothetical protein CLB_3053		YP_001385349.1	hypothetical protein CLB_3055		YP_001385350.1	hypothetical protein CLB_3056		YP_001385351.1	hypothetical protein CLB_3057		YP_001385352.1	hypothetical protein CLB_3058	oTMHi|iTMHo
YP_001255519.1	Clostridium botulinum A str. ATCC 3502	Firmicutes	10	Transmembrane	YP_001255513.1	hypothetical protein		YP_001255514.1	hypothetical protein		YP_001255515.1	hypothetical protein		YP_001255516.1	hypothetical protein		YP_001255517.1	hypothetical protein		YP_001255518.1	hypothetical protein		YP_001255520.1	hypothetical protein		YP_001255521.1	hypothetical protein		YP_001255522.1	hypothetical protein		YP_001255523.1	phage-like membrane protein	oTMHi|iTMHo
YP_001388756.1	Clostridium botulinum A str. Hall	Firmicutes	10	Transmembrane	YP_001388750.1	hypothetical protein CLC_2920		YP_001388751.1	hypothetical protein CLC_2921		YP_001388752.1	hypothetical protein CLC_2922		YP_001388753.1	hypothetical protein CLC_2923		YP_001388754.1	hypothetical protein CLC_2924		YP_001388755.1	hypothetical protein CLC_2925		YP_001388757.1	hypothetical protein CLC_2927		YP_001388758.1	hypothetical protein CLC_2928		YP_001388759.1	hypothetical protein CLC_2929		YP_001388760.1	hypothetical protein CLC_2930	oTMHi|iTMHo
YP_002805546.1	Clostridium botulinum A2 str. Kyoto	Firmicutes	10	Transmembrane|Unknown function|Viral protein	YP_002805540.1	hypothetical protein CLM_3424		YP_002805541.1	hypothetical protein CLM_3425		YP_002805542.1	hypothetical protein CLM_3426		YP_002805543.1	hypothetical protein CLM_3427		YP_002805544.1	hypothetical protein CLM_3428		YP_002805545.1	hypothetical protein CLM_3429	DUF2718	YP_002805547.1	hypothetical protein CLM_3431		YP_002805548.1	hypothetical protein CLM_3432		YP_002805549.1	hypothetical protein CLM_3433		YP_002805550.1	hypothetical protein CLM_3434	oTMHi|iTMHo
YP_001788344.1	Clostridium botulinum A3 str. Loch Maree	Firmicutes	10	Transmembrane	YP_001788338.1	hypothetical protein CLK_2410		YP_001788339.1	hypothetical protein CLK_2411		YP_001788340.1	hypothetical protein CLK_2412		YP_001788341.1	hypothetical protein CLK_2413		YP_001788342.1	hypothetical protein CLK_2414		YP_001788343.1	hypothetical protein CLK_2415		YP_001788345.1	hypothetical protein CLK_2417		YP_001788346.1	hypothetical protein CLK_2418		YP_001788347.1	hypothetical protein CLK_2419		YP_001788348.1	phage protein	oTMHi|iTMHo|oTMHi
YP_001782660.1	Clostridium botulinum B1 str. Okra	Firmicutes	14	Plant protein|Protein-protein interaction|Transmembrane|Unknown function	YP_001782651.1	hypothetical protein CLD_1525	SPRY	YP_001782652.1	hypothetical protein CLD_1524	Sad1_UNC	YP_001782653.1	hypothetical protein CLD_1523		YP_001782654.1	hypothetical protein CLD_1522		YP_001782655.1	hypothetical protein CLD_1521		YP_001782656.1	hypothetical protein CLD_1520		YP_001782657.1	hypothetical protein CLD_1519		YP_001782658.1	hypothetical protein CLD_1518	DUF863	YP_001782659.1	hypothetical protein CLD_1517		YP_001782661.1	hypothetical protein CLD_1515		YP_001782662.1	hypothetical protein CLD_1514		YP_001782663.1	hypothetical protein CLD_1513		YP_001782664.1	phage protein	iTMHo|oTMHi	YP_001782665.1	phage-like membrane protein
YP_002864034.1	Clostridium botulinum Ba4 str. 657	Firmicutes	11	Transmembrane	YP_002864025.1	hypothetical protein CLJ_B3281		YP_002864028.1	hypothetical protein CLJ_B3284		YP_002864029.1	hypothetical protein CLJ_B3285		YP_002864030.1	hypothetical protein CLJ_B3286		YP_002864031.1	hypothetical protein CLJ_B3287		YP_002864032.1	hypothetical protein CLJ_B3288		YP_002864033.1	hypothetical protein CLJ_B3289		YP_002864035.1	hypothetical protein CLJ_B3291		YP_002864036.1	hypothetical protein CLJ_B3292		YP_002864037.1	hypothetical protein CLJ_B3293		YP_002864038.1	hypothetical protein CLJ_B3294	oTMHi|iTMHo
YP_001392304.1	Clostridium botulinum F str. Langeland	Firmicutes	17	Transmembrane|Unknown function	YP_001392298.1	hypothetical protein CLI_3077		YP_001392299.1	hypothetical protein CLI_3078	YopX	YP_001392300.1	hypothetical protein CLI_3079		YP_001392301.1	hypothetical protein CLI_3080		YP_001392302.1	hypothetical protein CLI_3081		YP_001392303.1	hypothetical protein CLI_3082		YP_001392305.1	hypothetical protein CLI_3084		YP_001392306.1	hypothetical protein CLI_3085		YP_001392307.1	hypothetical protein CLI_3086		YP_001392308.1	phage protein	oTMHi|iTMHo	YP_001392309.1	hypothetical protein CLI_3088		YP_001392310.1	hypothetical protein CLI_3089		YP_001392311.1	hypothetical protein CLI_3090		YP_001392312.1	hypothetical protein CLI_3091		YP_001392313.1	hypothetical protein CLI_3092
Operon data missing	Clostridium cellulovorans 743B	Firmicutes
Operon data missing	Clostridium saccharolyticum WM1	Firmicutes
None	Desulfitobacterium hafniense DCB-2	Firmicutes
YP_003191024.1	Desulfotomaculum acetoxidans DSM 771	Firmicutes	9	Chaperone|DNA binding|DNA methylation|DNA repair|NTPase|Nuclease|Restriction|Transmembrane	YP_003191015.1	XRE family transcriptional regulator	HTH_19	YP_003191016.1	DNA-cytosine methyltransferase	DNA_methylase|DNA_methylase	YP_003191017.1	restriction endonuclease R.NgoMIII	RE_Eco29kI	YP_003191018.1	hypothetical protein Dtox_1531	oTMHi	YP_003191019.1	SEC-C motif domain-containing protein		YP_003191020.1	hypothetical protein Dtox_1533	SAP	YP_003191021.1	SEC-C motif domain-containing protein		YP_003191022.1	putative transcriptional regulator	AAA_4	YP_003191023.1	DNA mismatch endonuclease Vsr	Vsr
YP_002938611.1	Eubacterium rectale ATCC 33656	Firmicutes	2	Enzyme|Transmembrane	YP_002938612.1	hypothetical protein EUBREC_2748	oTMHi	YP_002938613.1	hypothetical protein EUBREC_2749	Radical_SAM
None	Geobacillus kaustophilus HTA426	Firmicutes
Operon data missing	Paenibacillus polymyxa SC2	Firmicutes
YP_001835974.1	Streptococcus pneumoniae CGSP14	Firmicutes	1	Cell wall binding|Transmembrane	YP_001835973.1	choline binding protein PcpA	iTMHo|CW_binding_1|CW_binding_1|CW_binding_1|CW_binding_1
Operon data missing	Streptococcus pseudopneumoniae IS7493	Firmicutes
YP_692258.1	Alcanivorax borkumensis SK2	Gammaproteobacteria	8	Cell division|Cell shape|Enzyme|Protease|Receptor|Regulation|Transmembrane	YP_692250.1	mreB gene product	MreB_Mbl	YP_692251.1	mreC gene product	iTMHo|MreC	YP_692252.1	mreD gene product	oTMHi|iTMHo|oTMHi|iTMHo|oTMHi	YP_692253.1	maf-1 gene product	Maf	YP_692254.1	hypothetical protein	iTMHo	YP_692255.1	carbon-nitrogen hydrolase family protein	CN_hydrolase	YP_692256.1	tldD gene product	PmbA_TldD	YP_692257.1	cyclic nucleotide-binding protein	cNMP_binding
None	Colwellia psychrerythraea 34H	Gammaproteobacteria
YP_434555.1	Hahella chejuensis KCTC 2396	Gammaproteobacteria	1	Chaperone|Unknown function	YP_434554.1	hemolysin activation/secretion protein	POTRA_2|Bac_surface_Ag
YP_434781.1	Hahella chejuensis KCTC 2396	Gammaproteobacteria	2	Nuclease	YP_434780.1	hypothetical protein HCH_03615		YP_434782.1	hypothetical protein HCH_03617	DUF2466
Operon data missing	Hahella chejuensis KCTC 2397	Gammaproteobacteria
Operon data missing	Legionella pneumophila 2300/99 Alcoy	Gammaproteobacteria
None	Legionella pneumophila str. Corby	Gammaproteobacteria
None	Legionella pneumophila str. Lens	Gammaproteobacteria
None	Legionella pneumophila str. Paris	Gammaproteobacteria
None	Legionella pneumophila subsp. pneumophila str. Philadelphia 1	Gammaproteobacteria
Operon data missing	Methylomonas methanica MC09	Gammaproteobacteria
None	Nitrosococcus halophilus Nc4	Gammaproteobacteria
YP_343880.1	Nitrosococcus oceani ATCC 19707	Gammaproteobacteria	1		YP_343881.1	hypothetical protein Noc_1885
Operon data missing	Pseudomonas syringae pv. tomato str. DC3000	Gammaproteobacteria
YP_001355406.1	Shewanella baltica OS185	Gammaproteobacteria	1	Signaling	YP_001355405.1	hypothetical protein Shew185_4383	DUF1863
None	Shewanella sp. MR-4	Gammaproteobacteria
Operon data missing	Stenotrophomonas maltophilia JV3	Gammaproteobacteria
YP_001974319.1	Stenotrophomonas maltophilia K279a	Gammaproteobacteria	1	NTPase|Ribosome|Translation|tRNA processing	YP_001974318.1	tRNA modification GTPase TrmE	TrmE_N|MMR_HSR1|GTPase_Cys_C
YP_002030424.1	Stenotrophomonas maltophilia R551-3	Gammaproteobacteria	1	NTPase|Ribosome|Translation|tRNA processing	YP_002030423.1	tRNA modification GTPase TrmE	TrmE_N|MMR_HSR1|GTPase_Cys_C
YP_002155784.1	Vibrio fischeri MJ11	Gammaproteobacteria	1	Signaling	YP_002155783.1	nuclease	DUF1863
None	Xanthomonas axonopodis pv. citri str. 306	Gammaproteobacteria
YP_245384.2	Xanthomonas campestris pv. campestris str. 8004	Gammaproteobacteria	1	NTPase|Ribosome|Translation|tRNA processing	YP_245383.1	tRNA modification GTPase TrmE	TrmE_N|MMR_HSR1|GTPase_Cys_C
NP_639573.2	Xanthomonas campestris pv. campestris str. ATCC 33913	Gammaproteobacteria	1	NTPase|Ribosome|Translation|tRNA processing	NP_639572.1	tRNA modification GTPase TrmE	TrmE_N|MMR_HSR1|GTPase_Cys_C
YP_001904041.1	Xanthomonas campestris pv. campestris str. B100	Gammaproteobacteria	2	Receptor|Signaling|Unknown function	YP_001904040.1	hypothetical protein xccb100_2635	DUF1863	YP_001904042.1	hypothetical protein xccb100_2637	RyR
YP_001905870.1	Xanthomonas campestris pv. campestris str. B100	Gammaproteobacteria	1	NTPase|Ribosome|Translation|tRNA processing	YP_001905869.1	tRNA modification GTPase TrmE	TrmE_N|MMR_HSR1|GTPase_Cys_C
None	Xanthomonas campestris pv. vesicatoria str. 85-10	Gammaproteobacteria
None	Xanthomonas oryzae pv. oryzae KACC 10331	Gammaproteobacteria
None	Xanthomonas oryzae pv. oryzae MAFF 311018	Gammaproteobacteria
None	Xanthomonas oryzae pv. oryzae PXO99A	Gammaproteobacteria
NP_300056.1	Xylella fastidiosa 9a5c	Gammaproteobacteria	4	Insertion of membrane proteins|NTPase|Ribosome|Translation|Transmembrane|tRNA processing	NP_300055.1	tRNA modification GTPase TrmE	TrmE_N|MMR_HSR1|GTPase_Cys_C	NP_300057.1	inner membrane protein translocase component YidC	iTMHo|60KD_IMP	NP_300058.1	ribonuclease P	Ribonuclease_P	NP_300059.1	50S ribosomal protein L34	Ribosomal_L34
YP_001776785.1	Xylella fastidiosa M12	Gammaproteobacteria	4	Insertion of membrane proteins|NTPase|Ribosome|Translation|Transmembrane|tRNA processing	YP_001776784.1	tRNA modification GTPase TrmE	TrmE_N|MMR_HSR1|GTPase_Cys_C	YP_001776786.1	putative inner membrane protein translocase component YidC	iTMHo|60KD_IMP	YP_001776787.1	ribonuclease P	Ribonuclease_P	YP_001776788.1	50S ribosomal protein L34	Ribosomal_L34
YP_001830890.1	Xylella fastidiosa M23	Gammaproteobacteria	4	Insertion of membrane proteins|NTPase|Ribosome|Translation|tRNA processing	YP_001830889.1	tRNA modification GTPase TrmE	TrmE_N|MMR_HSR1|GTPase_Cys_C	YP_001830891.1	putative inner membrane protein translocase component YidC	60KD_IMP	YP_001830892.1	ribonuclease P	Ribonuclease_P	YP_001830893.1	50S ribosomal protein L34	Ribosomal_L34
NP_780290.1	Xylella fastidiosa Temecula1	Gammaproteobacteria	4	Insertion of membrane proteins|NTPase|Ribosome|Translation|tRNA processing	NP_780289.1	trmE gene product	TrmE_N|MMR_HSR1|GTPase_Cys_C	NP_780291.1	inner membrane protein translocase component YidC	60KD_IMP	NP_780292.1	rnpA gene product	Ribonuclease_P	NP_780293.1	rpmH gene product	Ribosomal_L34
YP_002762610.1	Gemmatimonas aurantiaca T-27	Gemmatimonadetes	2	Protein-protein interaction|Transmembrane|Unknown function	YP_002762609.1	hypothetical membrane protein	oTMHi|iTMHo|VWA|DUF1355	YP_002762611.1	hypothetical protein GAU_3099
Operon data missing	Candidatus Nitrospira defluvii	Nitrospirae
YP_002249695.1	Thermodesulfovibrio yellowstonii DSM 11347	Nitrospirae	2	Transmembrane	YP_002249694.1	hypothetical protein THEYE_A1904		YP_002249696.1	lipoprotein,	oTMHi
Operon data missing	Isosphaera pallida ATCC 43644	Planctomycetes
None	Pirellula staleyi DSM 6068	Planctomycetes
Operon data missing	Planctomyces brasiliensis DSM 5305	Planctomycetes
Operon data missing	Planctomyces limnophilus DSM 3776	Planctomycetes
Operon data missing	Rhodopirellula baltica SH 1	Planctomycetes
YP_001964987.1	Leptospira biflexa serovar Patoc strain 'Patoc 1 (Ames)'	Spirochaetes	4	Unknown function	YP_001964983.1	hypothetical protein LBF_4248		YP_001964984.1	hypothetical protein LBF_4249		YP_001964985.1	putative lipoprotein	Kelch_1	YP_001964986.1	hypothetical protein LBF_4251	Kelch_1|Kelch_1
YP_001964661.1	Leptospira biflexa serovar Patoc strain 'Patoc 1 (Paris)'	Spirochaetes	1	Transmembrane	YP_001964662.1	methyl-accepting chemotaxis protein	iTMHo|oTMHi|iTMHo|oTMHi|iTMHo
None	Leptospira borgpetersenii serovar Hardjo-bovis JB197	Spirochaetes
None	Leptospira borgpetersenii serovar Hardjo-bovis L550	Spirochaetes
None	Leptospira interrogans serovar Copenhageni str. Fiocruz L1-130	Spirochaetes
None	Leptospira interrogans serovar Lai str. 56601	Spirochaetes
Operon data missing	Sphaerochaeta globus str. Buddy	Spirochaetes
Operon data missing	Spirochaeta smaragdinae DSM 11293	Spirochaetes
Operon data missing	Treponema azotonutricium ZAS-9	Spirochaetes
Operon data missing	Treponema brennaborense DSM 12168	Spirochaetes
Operon data missing	Treponema primitia ZAS-2	Spirochaetes
Operon data missing	Treponema succinifaciens DSM 2489	Spirochaetes
None	Candidatus Cloacamonas acidaminovorans	unclassified Bacteria
YP_867113.1	Magnetococcus sp. MC-1	unclassified Proteobacteria	2	Enzyme|Protein modification	YP_867112.1	hypothetical protein	FGE-sulfatase	YP_867114.1	fructose-bisphosphate aldolase	F_bP_aldolase
YP_003548177.1	Coraliomargarita akajimensis DSM 45221	Verrucomicrobia	1		YP_003548176.1	hypothetical protein
*Proteobacteria have been divided into classes, whereas non-Proteobacterial species are referred to by their phylum name
**The presence of “Peptidase C14” indicates a multi-metacaspase operon
[truncated: 6 more columns]

## Sheet: analysed; no op
Agrobacterium radiobacter K84
Agrobacterium vitis S4
Alkaliphilus metalliredigens QYMF
Arthrobacter sp. FB24
Bacillus cereus AH187
Bacillus cereus AH820
Beijerinckia indica subsp. indica ATCC 9039
Beutenbergia cavernae DSM 12333
Bordetella bronchiseptica RB50
Burkholderia multivorans ATCC 17616
Burkholderia phymatum STM815
Burkholderia phytofirmans PsJN
Burkholderia sp. CCGE1002
Burkholderia vietnamiensis G4
Burkholderia xenovorans LB400
Candidatus Cloacamonas acidaminovorans
Candidatus Koribacter versatilis Ellin345
Candidatus Protochlamydia amoebophila UWE25
Chlorobium chlorochromatii CaD3
Chlorobium limicola DSM 245
Chlorobium phaeobacteroides DSM 266
Chloroflexus aurantiacus J-10-fl
Chloroflexus sp. Y-400-fl
Clostridiales genomosp. BVAB3 str. UPII9-5
Colwellia psychrerythraea 34H
Cyanothece sp. PCC 7822
Cytophaga hutchinsonii ATCC 33406
Desulfitobacterium hafniense DCB-2
Desulfobacterium autotrophicum HRM2
Desulfovibrio magneticus RS-1
Frankia sp. EAN1pec
Geobacillus kaustophilus HTA426
Geobacter sp. M21
Legionella pneumophila str. Corby
Legionella pneumophila str. Lens
Legionella pneumophila str. Paris
Legionella pneumophila subsp. pneumophila str. Philadelphia 1
Leptospira borgpetersenii serovar Hardjo-bovis JB197
Leptospira borgpetersenii serovar Hardjo-bovis L550
Leptospira interrogans serovar Copenhageni str. Fiocruz L1-130
Leptospira interrogans serovar Lai str. 56601
Methylibium petroleiphilum PM1
Methylobacterium extorquens AM1
Methylobacterium extorquens DM4
Methylobacterium extorquens PA1
Nitrobacter hamburgensis X14
Nitrosococcus halophilus Nc4
Oligotropha carboxidovorans OM5
Pirellula staleyi DSM 6068
Prosthecochloris aestuarii DSM 271
Rhizobium etli CIAT 652
Rhodopseudomonas palustris BisB18
Roseiflexus sp. RS-1
Shewanella sp. MR-4
Sphingopyxis alaskensis RB2256
Stigmatella aurantiaca DW4/3-1
Streptomyces coelicolor A3(2)
Synechococcus elongatus PCC 6301
Synechococcus elongatus PCC 7942
Synechococcus sp. JA-2-3B'a(2-13)
Synechococcus sp. JA-3-3Ab
Synechococcus sp. PCC 7002
Thauera sp. MZ1T
Thermobifida fusca YX
Thermococcus onnurineus NA1
Thermosynechococcus elongatus BP-1
Variovorax paradoxus S110
Xanthomonas axonopodis pv. citri str. 306
Xanthomonas campestris pv. vesicatoria str. 85-10
Xanthomonas oryzae pv. oryzae KACC10331
Xanthomonas oryzae pv. oryzae MAFF 311018
Xanthomonas oryzae pv. oryzae PXO99A
